# Supplementary material for: A mitochondria-targeted rhodol fluorescent probe for imaging of hydrogen peroxide in living cells
Source: Royal Society of Chemistry journal article supplement (doi:10.1039/d2ay00522k), 2022-01-01
Supplement: d2ay00522k1.pdf [file d2ay00522k1.pdf]

1

# Supplementary Material

## 2 **A mitochondria-targeted rhodol fluorescence probe for imaging** 3 **of hydrogen peroxide in living cells**

### 4 **Experimental Section**

#### 5 **Instrumentation and Reagents**

6 <sup>1</sup>H-NMR spectra were recorded on an Avance NEO 400 NMR spectrometer  
7 (Bruker Inc., Switzerland). Mass spectra (MS) were recorded on a TSQ Quantum  
8 Access MAX triple-quadrupole mass spectrometer (Thermo Fisher Scientific, USA).  
9 An INESA Scientific PHS-3C pH meter was employed for the pH measurements of all  
10 solutions. Fluorescence spectra were collected on an F-7000 fluorescence spectrometer  
11 (Hitachi Co., Ltd. Japan) with a 1-cm quartz cell. Absorption spectra were recorded on  
12 a Cary 60 UV-spectrophotometer (Agilent Technologies, USA) with a 1-cm quartz cell.  
13 Cell imaging experiments were carried out on an LSM 710 laser scanning confocal  
14 microscope (Carl Zeiss, Oberkochen, Germany).

15 H<sub>2</sub>O<sub>2</sub> and acetic acid were purchased from Aladdin Chemistry Co. Ltd (Shanghai,  
16 China). All reagents were of analytical reagent grade and used without further  
17 purification or treatment. All aqueous solutions were prepared with ultrapure water  
18 obtained by a Milli-Q water purification system (18.2 MΩ cm). A549 (Human lung  
19 cancer) cells and human serum were obtained from the Anshan Central Hospital.

20

21

22 **Figures**

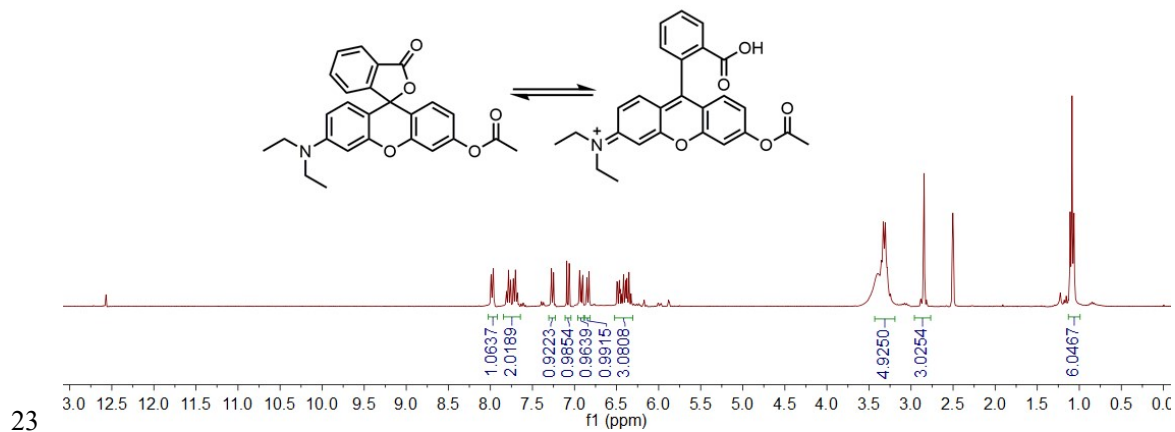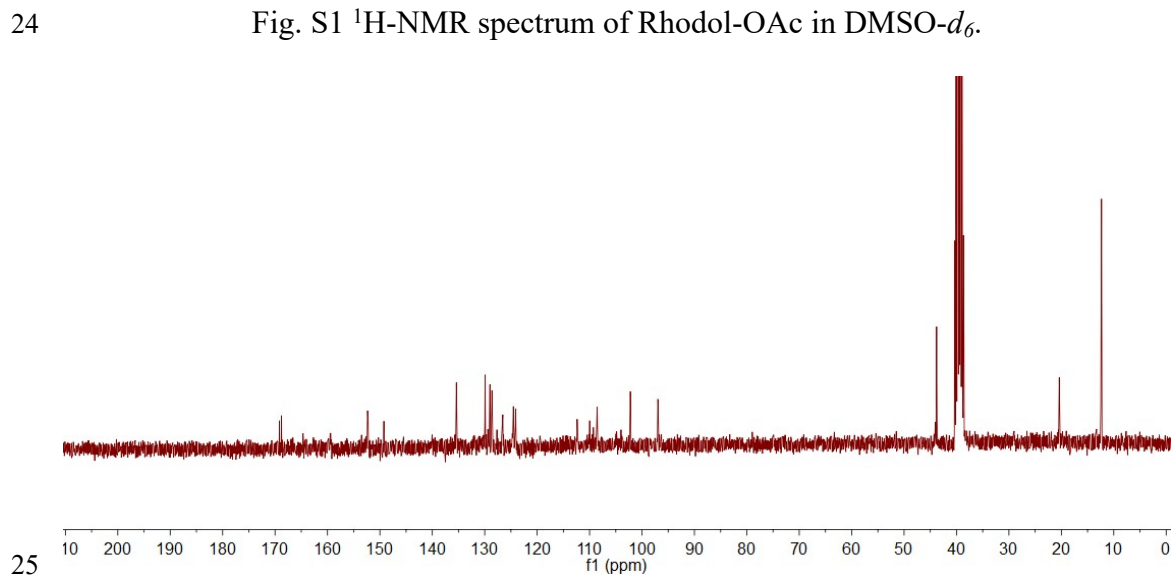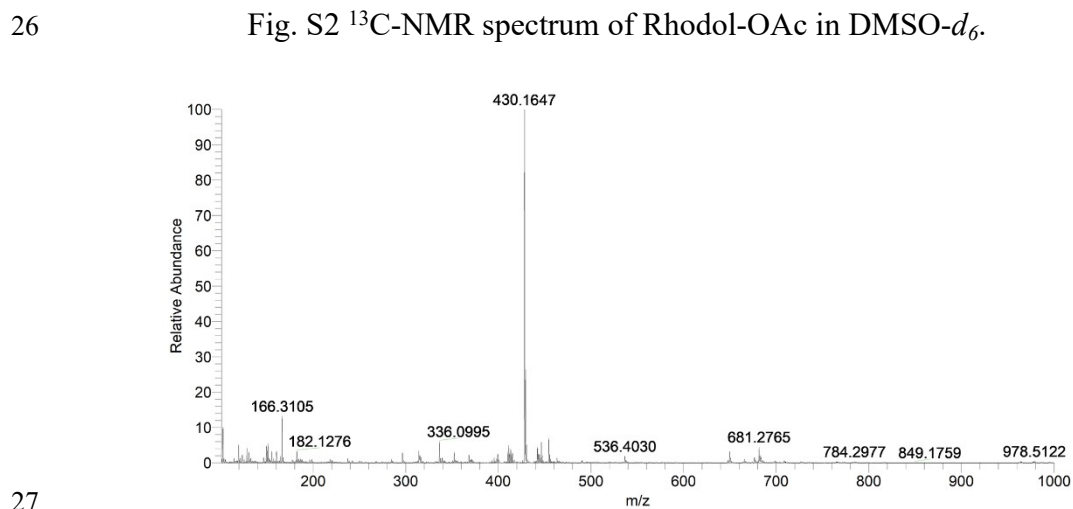

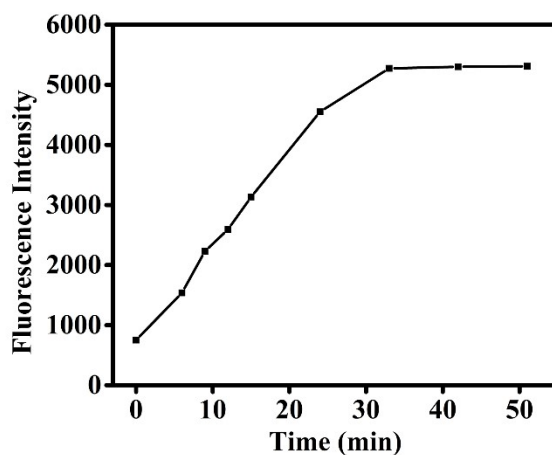

29

v

30 Fig. S4 Time-dependent fluorescence intensity changes of Rhodol-OAc (10 μM) after  
 31 the addition of H<sub>2</sub>O<sub>2</sub> (200 μM) in PBS/EtOH (99:1, v/v, 10 mM PBS, pH 7.4). ( $\lambda_{\text{ex}}=500$   
 32 nm)

33

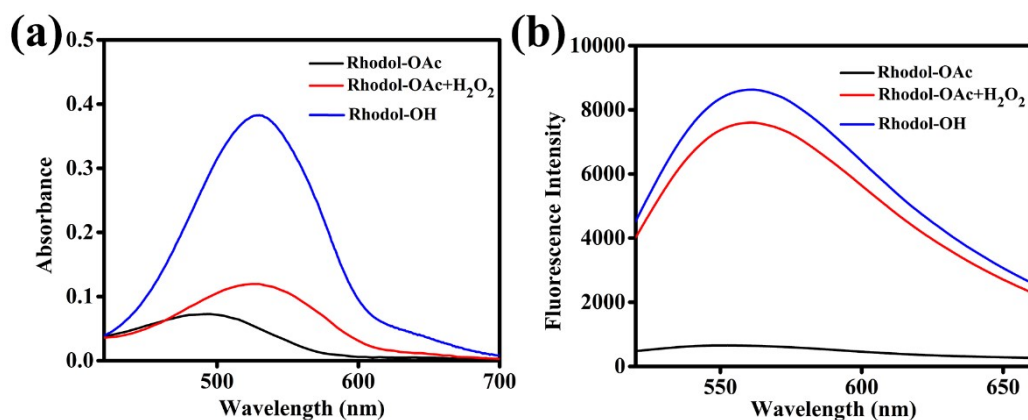

34

35 Fig. S5 (a) Absorption and (b) emission spectra of 10 μM Rhodol-OH and 10 μM  
 36 Rhodol-OAc in the absence and presence of H<sub>2</sub>O<sub>2</sub> (200 μM) in PBS/EtOH (99:1, v/v,  
 37 10 mM PBS, pH 7.4). ( $\lambda_{\text{ex}}=500$  nm)

38

39

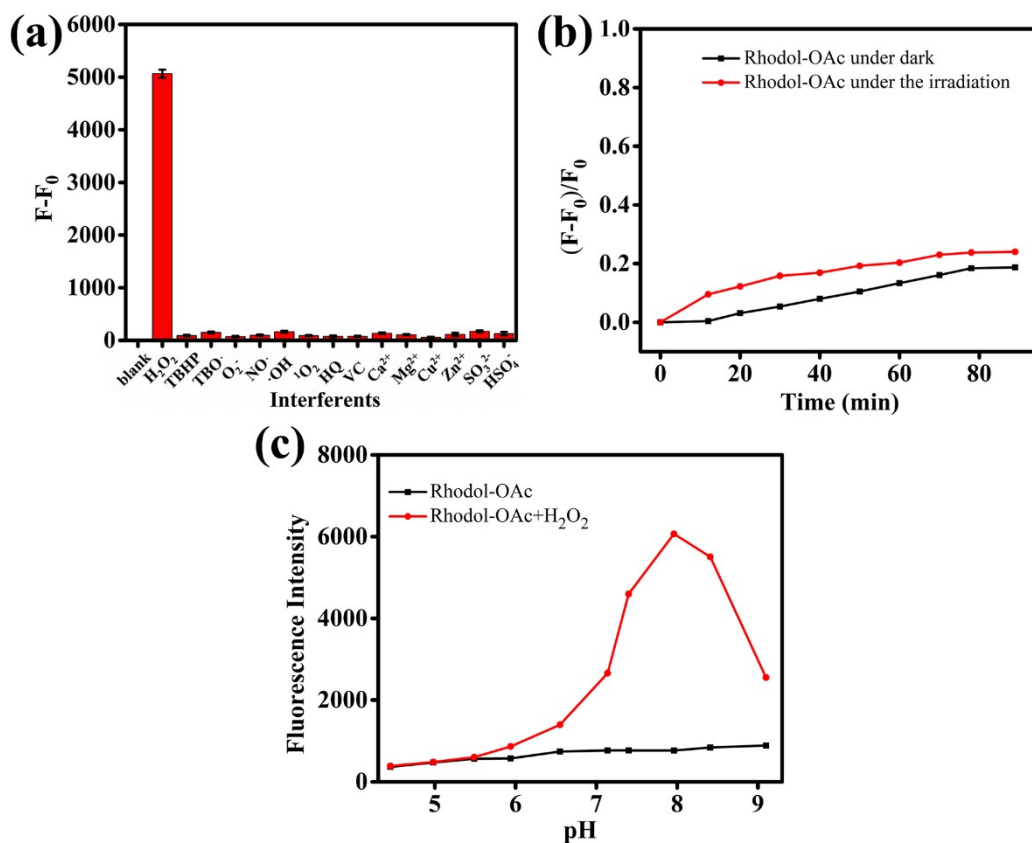

40

41 Fig. S6 (a) Fluorescence intensity increases of Rhodol-OAc (10  $\mu\text{M}$ ) after the addition  
 42 of various interferents (200  $\mu\text{M}$ ). (b) Time-dependent ratio of fluorescence increase of  
 43 Rhodol-OAc (10  $\mu\text{M}$ ) under irradiation of light ( $\lambda_{\text{ex}}=500$  nm) or in darkness. Ratio of  
 44 fluorescence increase was calculated according to the equation:  $(F-F_0)/F_0$ , where  $F_0$  and  
 45  $F$  are fluorescence intensities of the testing system obtained at beginning and certain  
 46 testing time, respectively. (c) Fluorescence intensity of Rhodol-OAc (10  $\mu\text{M}$ ) and  
 47 Rhodol-OAc (10  $\mu\text{M}$ ) with  $\text{H}_2\text{O}_2$  (200  $\mu\text{M}$ ) under various environmental pH at 37  $^\circ\text{C}$   
 48 for 30 min.  $\lambda_{\text{ex}}=500$  nm,  $\lambda_{\text{em}}=560$  nm.

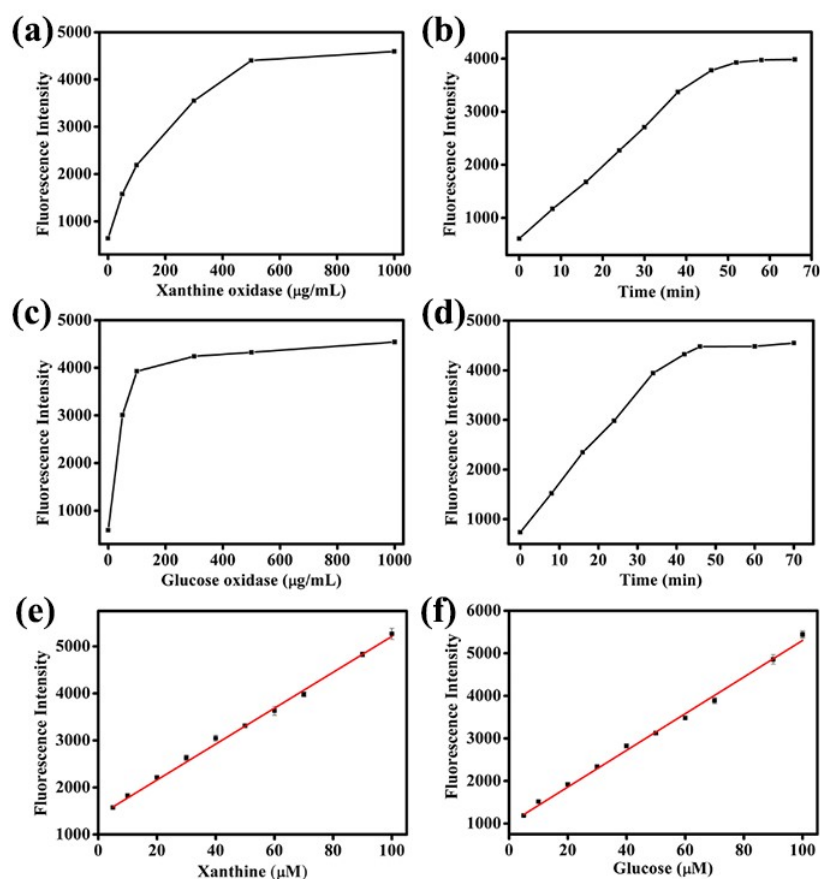

49

50 Fig. S7 Optimal concentrations of xanthine oxidase (a) and glucose oxidase (c).  
 51 Reaction time between Rhodol-OAc and xanthine/xanthine oxidase (b) and that  
 52 between Rhodol-OAc and glucose/glucose oxidase (d). Linear relationship between  
 53 Rhodol-OAc and xanthine (e) and that between Rhodol-OAc and glucose (f).

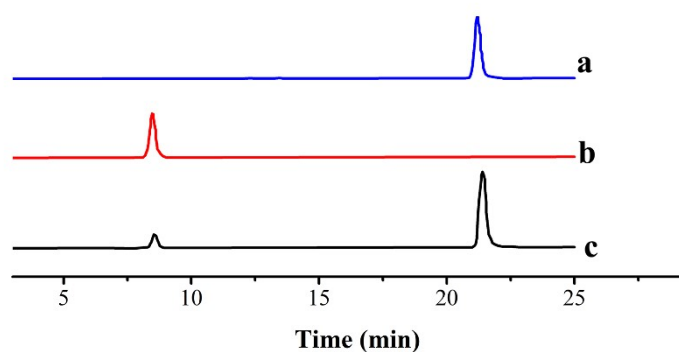

54

55 Fig. S8 HPLC analyses of different solutions. (a) Rhodol-OH (5  $\mu\text{M}$ ); (b) Rhodol-OAc  
 56 (5  $\mu\text{M}$ ); (c) the reaction solution of 5  $\mu\text{M}$  Rhodol-OAc with 50  $\mu\text{M}$   $\text{H}_2\text{O}_2$  for 30 min.  
 57 The detection wavelength was 500 nm.

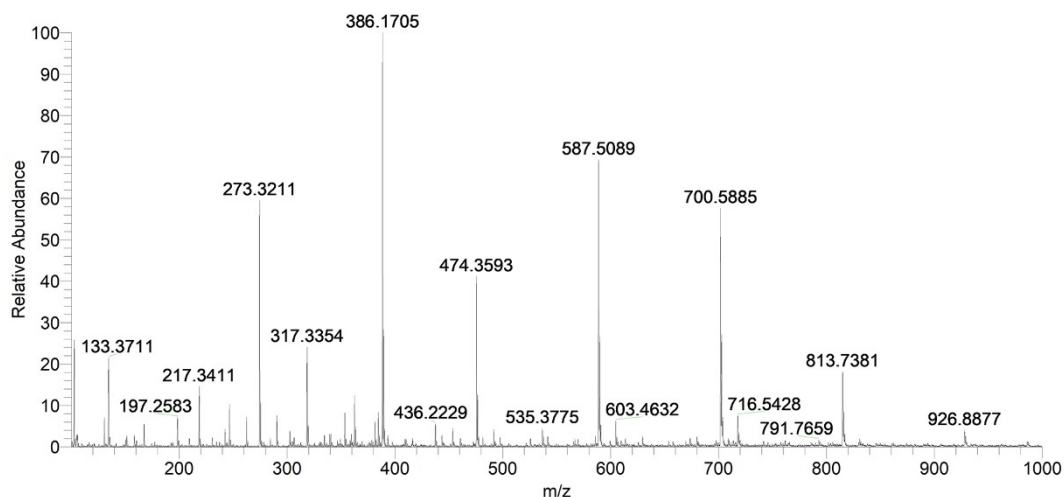

58

59 Fig. S9 ESI-MS spectrum of the product of reaction between Rhodol-OAc (10  $\mu\text{M}$ ) and  
 60  $\text{H}_2\text{O}_2$  (200  $\mu\text{M}$ ).

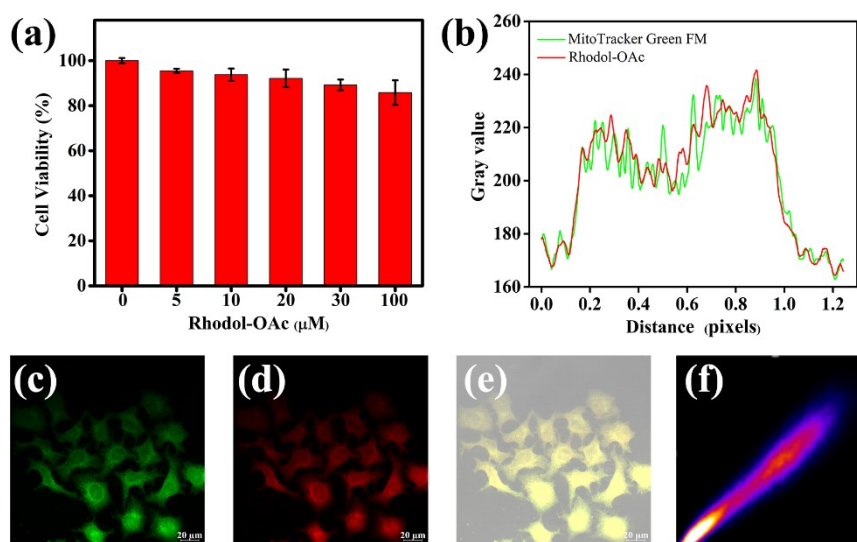

61

62 Fig. S10 (a) Cell viability of A549 cells in the presence of Rhodol-OAc at various  
 63 concentrations. Colocalization of Rhodol-OAc and Mito Tracker Green FM in the  
 64 mitochondria of A549 cells. (b) Fluorescence intensity of the regions of interest across  
 65 A549 cells. (c) A549 cells cultured with Mito Tracker Green FM (10  $\mu\text{M}$ ) for 30 min  
 66 at 37°C. (d) A549 cells cultured with Rhodol-OAc (10  $\mu\text{M}$ ) for 30 min at 37°C. (e)  
 67 Merged image of (a) and (e). (f) The correlation between the intensity of Rhodol-OAc  
 68 and that of Mito Tracker Green FM.

Table S1 Comparison of HAA with other reported fluorescence probe for H<sub>2</sub>O<sub>2</sub>

| Probe                                                                              | Reaction medium               | $\lambda_{\text{ex}}/\lambda_{\text{em}}$<br>(nm) | LOD<br>( $\mu\text{M}$ ) | Ref.      |
|------------------------------------------------------------------------------------|-------------------------------|---------------------------------------------------|--------------------------|-----------|
| Rhodol-OAc                                                                         | PBS:EtOH (99:1, v/v; pH 7.4)  | 500/560                                           | 0.055                    | This work |
| 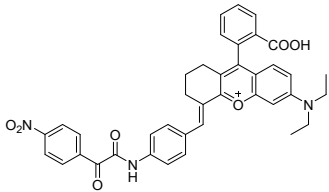  | PBS:DMSO (999:1, v/v; pH 7.4) | 590/730                                           | 0.061                    | [1]       |
|   | PBS (pH 7.4)                  | 670/708                                           | 0.14                     | [2]       |
|  | PBS:DMSO (99:1, v/v; pH 7.4)  | 395/(650/500)                                     | 0.27                     | [3]       |

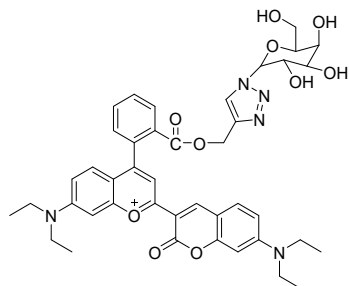

PBS:MeOH (9:1, v/v; pH 7.4)

650/(482/706)

0.33

[4]

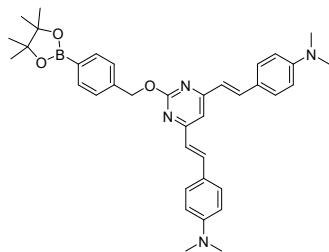

PBS:DMSO (499:1, v/v; pH 7.4)

540/640

1.38

[5]

70

## 71 Reference

72 [1] T. Gu, S. Mo, Y. Mu, X. Huang, L. Hu, Detection of endogenous hydrogen peroxide in living cells with para-nitrophenyl oxoacetyl rhodamine  
73 as turn-on mitochondria-targeted fluorescent probe, *Sensors and Actuators B: Chemical* 309 (2020) 127731.

74 [2] J. Zhang, L. Shi, Z. Li, D. Li, X. Tian, C. Zhang, Near-infrared fluorescence probe for hydrogen peroxide detection: design, synthesis, and  
75 application in living systems, *Analyst* 144(11) (2019) 3643-3648.

76 [3] Y. Liu, L. Bai, Y. Li, Y. Ni, C. Xin, C. Zhang, J. Liu, Z. Liu, L. Li, W. Huang, Visualizing hydrogen peroxide in Parkinson's disease models  
77 via a ratiometric NIR fluorogenic probe, *Sensors and Actuators B: Chemical* 279 (2019) 38-43.

78 [4] W.-L. Jiang, W.-X. Wang, J. Liu, Y. Li, C.-Y. Li, A novel hepatocyte-targeting ratiometric fluorescent probe for imaging hydrogen peroxide



79 in zebrafish, *Sensors and Actuators B: Chemical* 313 (2020) 128054.

80 [5] X. Qiu, C. Xin, W. Qin, Z. Li, D. Zhang, G. Zhang, B. Peng, X. Han, C. Yu, L. Li, W. Huang, A novel pyrimidine based deep-red fluorogenic  
81 probe for detecting hydrogen peroxide in Parkinson's disease models, *Talanta* 199 (2019) 628-633.

82
